# Supplementary material for: Evaluation of the impact of coal mining on surface water in the Boesmanspruit, Mpumalanga, South Africa
Source: Springer Nature journal article supplement (doi:10.1007/s12665-024-11431-6), 2024-03-01
Supplement: MOESM2 [file 26822346]

## Sheet: pH
		GR S12	GR S26	GR S21	GR S23	TD SW01	GR S13	Upper Limit	lower limit
	2017-01-01	6.8	7.3	6.4	7	6.8	7.2	8.8	8
	2017-02-01	8.7	7.5	6.7	7.1	7.5	7.1	8.8	8
	2017-03-01	6.2	7.8	6.3	5.8	7	6.3	8.8	8
	2017-04-01	6.7	7.1	6	6.5	7.3	6.5	8.8	8
	2017-05-01	6.7	7.26	6.5	6.5	6.9	6.9	8.8	8
	2017-06-01	6.9	7.43	6.4	6.3	7.4	6.7	8.8	8
	2017-07-01	7	6.5	6.6	6.7	7.3	6.9	8.8	8
	2017-08-01	6.9	6.01	6.7	7.1	7.3	6.8	8.8	8
	2017-09-01	7.4	6.8	6.9	6.9	7.3	6.6	8.8	8
	2017-10-01	6.8	6.6	7	5.1	7.2	6.2	8.8	8
	2017-11-01	6.8	7.5	7.24	6.7	7.5	6.4	8.8	8
	2017-12-01	6.36	7.36	7.23	6.4	7.22	6.38	8.8	8
	2018-01-01	6.8	7.4	6.3	6.9	7.6	6.8	8.8	8
	2018-02-01	6.8	7.4	6.8	6.3	8.9	7.1	8.8	8
	2018-03-01	6.85	7.7	6.6	6.5	7.2	6.8	8.8	8
	2018-04-01	7.31	7.43	6.72	7.01	7.35	7.02	8.8	8
	2018-05-01	6.7	7.3	6.4	6.5	7.1	6.8	8.8	8
	2018-06-01	6.88	7.42	6.61	6.99	7.41	6.9	8.8	8
	2018-07-01	6.81	7.1	6.73	7.25	7.13	6.76	8.8	8
	2018-08-01	7.13	7.6	6.82	5.97	7.46	7.09	8.8	8
	2018-09-01	6.79	6.77	6.63	6.56	7.97	6.75	8.8	8
	2018-10-01	6.86	6.3	7.23	6.86	7.89	6.87	8.8	8
	2018-11-01	7.14	6.43	6.8	6.91	7.23	6.87	8.8	8
	2018-12-01	7.28	6.9	7.44	7.51	7.22	7.1	8.8	8
	2019-01-01	8.82	6.64	7.06	6.86	7.43	7.34	8.8	8
	2019-02-01	7.34	6.57	7.19	7.13	7.25	6.84	8.8	8
	2019-03-01	9.74	6.44	6.82	6.93	7.11	7.9	8.8	8
	2019-04-01	7.09	5.45	6.7	6.64	7.13	6.83	8.8	8
	2019-05-01	8.89	4.37	7.04	6.98	7.03	7.93	8.8	8
	2019-06-01	8.11	4.87	7.41	7.22	8.66	6.52	8.8	8
	2019-07-01	7.25	4.75	7.38	6.82	7.1	6.8	8.8	8
	2019-08-01	8.57	5.25	7.51	7.98	7.17	7.08	8.8	8
	2019-09-01	7.28	5.78	7.05	7	7.23	6.33	8.8	8
	2019-10-01	9.61	5.87	6.71	7.92	7.14	7.03	8.8	8
	2019-11-01	7.06	5.68	6.9	7.72	7.53	7.09	8.8	8
	2019-12-01	6.03	5.94	3.83	7.07	6.64	6.27	8.8	8
	2020-01-01	6.7	6.36	3.54	5.37	7.75	6.8	8.8	8
	2020-02-01	7.55	6.93	3.62	7.4	7.08	7.11	8.8	8
	2020-03-01	8.96	6.48	3.36	6.98	7.07	8.12	8.8	8
	2020-04-01	6.86	6.01	7.85	3.3	6.74	6.82	8.8	8
	2020-05-01	6.96	6.6	3.8	6.63	7.43	7	8.8	8
	2020-06-01	8.51	7.59	3.44	6.74	7.02	6.96	8.8	8
	2020-07-01	7.03	7.1	3.53	6.84	6.92	7.13	8.8	8
	2020-08-01	7.32	7.45	3.62	7.63	8.16	7.28	8.8	8
	2020-09-01	8.92	7.26	3.14	7.37	6.84	6.75	8.8	8
	2020-10-01	9.05	7.15	3.19	7.24	7.55	6.82	8.8	8
	2020-11-01	9	7.24	3.28	7.51	7.68	7.24	8.8	8
	2020-12-01	10.2	7.56	3.2	7.5	7.77	7.27	8.8	8
	2021-01-01	6.48	6.06	3.06	6.15	7.76	6.15	8.8	8
	2021-02-01	6.06	6.93	5.86	6.06	7.17	6.91	8.8	8
	2021-03-01	6.32	6.95	6.58	6.52	7.33	6.66	8.8	8
	2021-04-01	6.85	7.76	6.9	7.29	7.2	7.26	8.8	8
	2021-05-01	7.34	7.73	4.37	7.06	6.73	7.57	8.8	8
	2021-06-01	6.49	7.17	4.33	7.26	7.16	6.71	8.8	8
	2021-07-01	6.78	7.19	4.97	7.89	7.27	6.87	8.8	8
	2021-08-01	5.59	6.41	3.98	5.7	7.37	6.04	8.8	8
	2021-09-01	5.77	7.47	3.78	5.8	7.93	6.38	8.8	8
	2021-10-01	4.82	6.85	3.9	5.16	7.23	5.74	8.8	8
	2021-11-01	6.64	7.56	4.21	5.31	7.93	6.78	8.8	8
	2021-12-01	6.46	6.77	4.24	5.98	6.95	6.16	8.8	8

## Sheet: EC
	GR S12	GR S26	GR S21	GR S23	TD SW01	GR S13	Limit
2017-01-01	12.96	229.1	23.72	11.79	14.52	8.8	30
2017-02-01	13.03	261.7	27.78	40.2	16.48	9.56	30
2017-03-01	14.11	269.9	11.25	20.36	10.9	8.81	30
2017-04-01	13.92	246.1	23.27	29.28	16.07	8.72	30
2017-05-01	14.08	241	13.7	22.81	15.61	8.89	30
2017-06-01	13.45	247.7	33.3	25.01	14.63	8.81	30
2017-07-01	15.56	245.4	48.1	30.4	17.19	10.99	30
2017-08-01	15.68	248	43.5	63.4	17.35	11.09	30
2017-09-01	18.01	261.2	49.6	46	20.99	13.23	30
2017-10-01	15.97	262.4	52.1	76.1	24.36	12.96	30
2017-11-01	20.33	252.1	58.3	41.3	31.1	14.96	30
2017-12-01	21.34	233.8	61.9	29.7	15.01	14.81	30
2018-01-01	15.75	250.4	20.91	25.74	14.66	9.76	30
2018-02-01	18.7	248.6	24.88	37.1	17.38	9.04	30
2018-03-01	16.02	249	31.6	26.04	24.41	9.66	30
2018-04-01	16.34	247.7	29.01	26.98	13.76	8.28	30
2018-05-01	16.42	250.9	28.08	29.9	15.35	9.27	30
2018-06-01	17.35	247.8	33.6	44.6	15.84	9.77	30
2018-07-01	18.17	393	38.5	76.6	22.89	10.37	30
2018-08-01	17.43	245.1	43	28.32	21.55	11.4	30
2018-09-01	19.2	209	51.4	27.3	16.4	16.2	30
2018-10-01	27	23	46.4	22.6	14.7	17.4	30
2018-11-01	21.2	21.1	38.9	17.6	14.4	15.2	30
2018-12-01	20.9	23.1	53.5	22.4	13.1	13.3	30
2019-01-01	18.7	22.5	33.7	21.5	13.8	13.6	30
2019-02-01	21.1	18.9	32.4	21.6	12.7	13.2	30
2019-03-01	21.4	25.1	33.6	42.3	14.3	15.6	30
2019-04-01	20.2	26	42.9	22.9	12.2	10.9	30
2019-05-01	21.4	40.5	42.4	44.3	12.4	13	30
2019-06-01	22.7	35.69	45.8	41	16.1	12	30
2019-07-01	24	28.45	48.3	88	14.3	13.3	30
2019-08-01	25	55.47	52.6	58	13.7	14.5	30
2019-09-01	27.1	48.99	62.2	105	18.8	16.8	30
2019-10-01	27.6	47.85	84	77.3	15	21.3	30
2019-11-01	33.4	49.54	76.5	73.9	15.5	18.8	30
2019-12-01	35.8	47.5	92	44.3	16.8	17.9	30
2020-01-01	30.3	31.3	79.5	23.8	16.3	13.2	30
2020-02-01	29.6	30.9	89.2	59	14.6	13.3	30
2020-03-01	28.9	261.7	111	38	14.8	13.3	30
2020-04-01	29.4	248	128	37.7	21.1	11.4	30
2020-05-01	32.4	259	137	47.7	17.8	11.8	30
2020-06-01	34	260	138	66.9	17.5	12.3	30
2020-07-01	36.2	248	148	68.2	18.7	13.6	30
2020-08-01	38.1	245	155	64.4	18.9	14.2	30
2020-09-01	40.9	241	178	61	37	17.3	30
2020-10-01	42.2	318	194	66.2	22.2	18	30
2020-11-01	44.3	323	221	104	41.3	20.3	30
2020-12-01	47.1	243	255	66	38.5	22.9	30
2021-01-01	78.8	284	309	23	36.4	23.8	30
2021-02-01	21.8	203	27.3	19.4	13.4	13.4	30
2021-03-01	23	248	24.4	27.7	12.8	12.5	30
2021-04-01	24.3	267	36.5	74.6	14.8	13.64	30
2021-05-01	25	267	44.2	71.5	42.8	13.8	30
2021-06-01	26.8	258	49.3	57	62.9	13.8	30
2021-07-01	30	258	50.9	65.2	67.2	16.9	30
2021-08-01	33.2	256	61	19.31	65.6	17.6	30
2021-09-01	36.6	284	66	57.2	48.8	17.9	30
2021-10-01	39	267	83.9	80	19	22.2	30
2021-11-01	32	268	89	74.7	18.93	20.6	30
2021-12-01	19	97.2	89.4	26.5	13.8	11.5	30

## Sheet: TDS
		GR S12	GR S26	GR S21	GR S23	TD SW01	GR S13	Limit
	2017-01-01	30.5	1569.28	82.94	127.25	29.33	21.88	1000
	2017-02-01	31.9	1852.66	84.3	83.33	26.42	22.96	1000
	2017-03-01	45.49	1811.46	32.38	82.09	27.88	32.26	1000
	2017-04-01	35.4	1450.96	79.75	69.78	22.65	23.92	1000
	2017-05-01	37.76	2157	34.43	70.46	27.03	27.35	1000
	2017-06-01	76.78	1766.86	194.8	143.76	82.87	54.24	1000
	2017-07-01	72.3	1653.63	165.88	145.03	77.18	58.65	1000
	2017-08-01	80.45	2287	252.38	308.4	93.5	58.38	1000
	2017-09-01	37.13	2152	192.7	74.7	31.41	43.57	1000
	2017-10-01	31.97	1775.15	190.63	329.4	124.52	33.32	1000
	2017-11-01	50.33	1703.63	181.2	116.4	54.35	42.67	1000
	2017-12-01	69.02	1338.44	222.88	120.92	27.83	43.86	1000
	2018-01-01	43.9	1553.82	60.53	33.48	22.23	32.2	1000
	2018-02-01	32.05	1440.97	70.16	154.39	29.69	35.24	1000
	2018-03-01	34.89	1015.5	63.61	37.77	28.78	24.59	1000
	2018-04-01	45	1772.86	95.63	95.75	29.04	27.55	1000
	2018-05-01	45.18	1364.24	78.14	111.36	33.95	30.68	1000
	2018-06-01	42.12	1686.21	124.49	112.14	32.57	29.6	1000
	2018-07-01	50.48	3344.57	149.75	126.83	54.89	32.43	1000
	2018-08-01	60.81	1597.26	174.35	117.63	43.47	38.51	1000
	2018-09-01	116	1868	334	182	114	112	1000
	2018-10-01	184	208	316	154	122	112	1000
	2018-11-01	198	170	320	136	120	108	1000
	2018-12-01	202	192	288	142	108	114	1000
	2019-01-01	140	198	312	150	128	120	1000
	2019-02-01	124	126	310	152	110	106	1000
	2019-03-01	124	166	308	260	94	108	1000
	2019-04-01	138	172	250	164	126	100	1000
	2019-05-01	156	242	250	266	127	108	1000
	2019-06-01	158	178	296	282	116	110	1000
	2019-07-01	150	196	312	582	112	108	1000
	2019-08-01	166	208	336	382	102	120	1000
	2019-09-01	198	287	330	686	124	126	1000
	2019-10-01	188	378	660	702	114	144	1000
	2019-11-01	216	402	602	590	112	160	1000
	2019-12-01	228	418	702	342	128	154	1000
	2020-01-01	188	228	518	164	112	104	1000
	2020-02-01	184	244	622	324	110	104	1000
	2020-03-01	226	1852.66	748	204	112	104	1000
	2020-04-01	147.664	2287	768.03	200.77	101.63	56.916	1000
	2020-05-01	181.78	2351.48	764.891	230.189	90.51	60.87	1000
	2020-06-01	188	2379	836	336	86.3	65.6	1000
	2020-07-01	199	2258	890	341	95.2	68.8	1000
	2020-08-01	208	2237	984	323	98	69.6	1000
	2020-09-01	236	2157	1120	317	153	92	1000
	2020-10-01	239.178	3043.75	1269.81	383.854	113.109	100.598	1000
	2020-11-01	242.86	3135.67	1527.08	600.894	211.09	100.72	1000
	2020-12-01	274.68	2390.29	1655.61	153.647	194.77	118.43	1000
	2021-01-01	512.21	2601.67	2117.2	118.33	181.46	135.06	1000
	2021-02-01	119.38	1922.63	159.08	103.84	65.67	62.27	1000
	2021-03-01	125.546	2237.84	118.93	140.71	62.68	59.848	1000
	2021-04-01	137.91	2320.71	211.89	336.46	68.83	71.91	1000
	2021-05-01	136.48	2495.16	259.926	353.87	236.582	69.679	1000
	2021-06-01	151.76	2448.92	303.939	305.915	392.11	58.75	1000
	2021-07-01	185.772	2351.57	292.72	153.821	445.93	90.57	1000
	2021-08-01	190.71	2349.22	323.96	69.25	382.93	94.95	1000
	2021-09-01	204.482	2177.22	369.41	282.6	361.7	86.713	1000
	2021-10-01	205.197	2449.96	485.014	512.28	91.27	122.3	1000
	2021-11-01	194.41	2315.95	545.49	503.49	100.42	118.35	1000
	2021-12-01	101.61	643.172	531.86	149.97	85.04	64.05	1000

## Sheet: Ca
		GR S12	GR S26	GR S21	GR S23	TD SW01	GR S13	Limit
	2017-01-01	7	328.1	12.3	12.9	12	6	1000
	2017-02-01	7.4	380	15.5	18.8	13.7	5.4	1000
	2017-03-01	7.4	384.1	5.8	12.2	7.5	5.4	1000
	2017-04-01	7.9	352.8	13.1	17.8	11.6	4.5	1000
	2017-05-01	6.7	349	6.1	11.2	10.8	5	1000
	2017-06-01	7	325.2	21.5	15.3	12.1	5.1	1000
	2017-07-01	4.6	305.6	8.4	10.6	7.9	5.1	1000
	2017-08-01	6.4	377	25.6	21.5	12.9	5	1000
	2017-09-01	7.6	382	31.9	28	16.4	5.3	1000
	2017-10-01	6	323.4	28.1	51.6	13.5	4.5	1000
	2017-11-01	7.4	322.7	7.1045	25	17.6	5.9	1000
	2017-12-01	11.6	319.2	39.6	19.2	10.7	6.8	1000
	2018-01-01	8.7	347.7	9.8	17.8	9.9	5.5	1000
	2018-02-01	8.9	258.8	12.1	24.7	11.3	10	1000
	2018-03-01	8.6	282	16	15.8	16.1	5	1000
	2018-04-01	8.8	335.2	15	14.7	9.4	4.3	1000
	2018-05-01	9.3	316.6	13.4	16.6	12.2	5.1	1000
	2018-06-01	8.9	334.6	18.9	16.7	9.4	4.5	1000
	2018-07-01	10.9	377.4	25.5	30.1	21.3	5.3	1000
	2018-08-01	9.2	341.6	23.4	19.9	16.5	5.3	1000
	2018-09-01	9.49	341	32.7	16	9.58	7.15	1000
	2018-10-01	18.2	7.36	28.7	12.6	7.93	8.87	1000
	2018-11-01	13.9	5.57	25.5	10.7	8.56	7.8	1000
	2018-12-01	15.8	5.84	24.6	18.6	8.37	7.43	1000
	2019-01-01	10.8	4.36	20	12.2	7.94	5.85	1000
	2019-02-01	10.3	4.34	16.4	11.6	6.28	4.9	1000
	2019-03-01	10.4	5.23	19.2	22.2	7.48	5.01	1000
	2019-04-01	11.2	7.79	25.6	12.5	6.61	4.79	1000
	2019-05-01	9.73	12.8	24.8	14.8	6.5	4.46	1000
	2019-06-01	11	328.1	28.9	14.7	9.68	4.88	1000
	2019-07-01	11.9	380	28.5	40.5	7.68	5.17	1000
	2019-08-01	12.9	384.1	33.4	32.5	7.41	5.98	1000
	2019-09-01	11.9	352.8	37	43.7	11.1	5.81	1000
	2019-10-01	10.4	254.62	64	30.9	4.15	5.67	1000
	2019-11-01	17.2	80.74	55.2	33.4	7.99	8.27	1000
	2019-12-01	23.7	28	66.3	25.1	7.78	8.03	1000
	2020-01-01	18.8	13.9	47.7	13.6	7.06	5.84	1000
	2020-02-01	18.9	11.3	56.6	23.2	8.62	6.13	1000
	2020-03-01	17	380	59.9	17.6	7.53	4.96	1000
	2020-04-01	18.091	377	77.5	23.9	13.8	4.002	1000
	2020-05-01	20.3	363	76.02	12.397	10.6	4.13	1000
	2020-06-01	22.7	365	82.1	20.9	10.8	5.51	1000
	2020-07-01	24.7	370	98.6	27.9	13.1	4.05	1000
	2020-08-01	23.7	364	101	24.1	14.1	4.32	1000
	2020-09-01	25.9	349	148	26.2	21.8	6.77	1000
	2020-10-01	26	397	145	36.1	12	7.84	1000
	2020-11-01	25	359	166	46.1	44.6	8.69	1000
	2020-12-01	29.8	367	166	27.6966	44.2	10.25	1000
	2021-01-01	61.2	328	235	16.6	43.1	11.83	1000
	2021-02-01	12.9	306	16.7	11.4	5.62	5.26	1000
	2021-03-01	12.709	357.538	11.1	16.9	5.5	4.9	1000
	2021-04-01	13.7	393	21.5	21.4	7.92	5.32	1000
	2021-05-01	13.4	381	25.5	21	42.9	4.3	1000
	2021-06-01	14.3648	368.157	30.44	16.5	82.6	4.72	1000
	2021-07-01	18.2	361	33.2	29.4629	86.2	6.32	1000
	2021-08-01	19.5	381	37.6	11.9	72.3	6.4	1000
	2021-09-01	20.1	342.589	36.6	33.5	62.6	6.34	1000
	2021-10-01	22.889	382.853	43.4	62.7	9.32	9.47	1000
	2021-11-01	22.2	362	53.6	59.2	10.83	9.58	1000
	2021-12-01	11.6	96.8	51.3	17.6	7.64	6.65	1000

## Sheet: Mg
		GR S12	GR S26	GR S21	GR S23	TD SW01	GR S13	Limit
	2017-01-01	4.7	170	11.4	9.1	6.8	3.8	500
	2017-02-01	5.4	190.4	13.5	10.3	7.3	3.5	500
	2017-03-01	5	211.1	4.4	9	4.3	3.2	500
	2017-04-01	5.8	170.2	11.7	12.8	6.8	2.8	500
	2017-05-01	5.5	183	4.9	9.5	6.2	3.3	500
	2017-06-01	5.5	188.2	19.7	12.6	6.9	3.5	500
	2017-07-01	3.7	181	6.9	8.5	4.7	3.8	500
	2017-08-01	5.6	210.02	25.6	15.7	7.4	3.5	500
	2017-09-01	6.5	192.2	30.7	19.9	9.4	3.6	500
	2017-10-01	5.2	189.6	27.6	31	7.7	3	500
	2017-11-01	5.6	159.6	6.2561	15.5	10.2	4.3	500
	2017-12-01	5	156.2	34.8	12.5	5.9	4.4	500
	2018-01-01	5.5	162.5	8	12	5.4	2.9	500
	2018-02-01	6.3	129.4	11.5	15.8	6.5	3	500
	2018-03-01	6.1	139.6	14.1	10.6	8.6	3.1	500
	2018-04-01	6.2	187.2	14.1	11.2	5.3	2.8	500
	2018-05-01	7	177.9	13.5	13.4	6.8	3.2	500
	2018-06-01	6.7	174.1	18	12.9	5.5	3.1	500
	2018-07-01	8.7	423.1	24.6	16.5	13	3.8	500
	2018-08-01	7.3	179.8	22.8	13.2	9.6	3.8	500
	2018-09-01	7.21	178	30.2	11.2	5.48	4.54	500
	2018-10-01	10.3	5.21	25	8.37	4.63	5.48	500
	2018-11-01	7.89	4.58	24.5	7.37	4.82	4.75	500
	2018-12-01	9.49	5.59	25.4	13	5.09	4.68	500
	2019-01-01	7.14	4.33	18.5	9.07	4.65	3.59	500
	2019-02-01	6.94	3.29	15.7	8.98	3.89	3.01	500
	2019-03-01	6.9	4.12	18.3	15.7	4.36	3.31	500
	2019-04-01	7.73	5.4	23.1	9.52	3.98	3.05	500
	2019-05-01	6.87	8.14	22.2	10.8	3.98	2.96	500
	2019-06-01	7.72	7.85	24.1	11.5	5.24	3.25	500
	2019-07-01	7.91	8.88	25.6	23	4.43	3.2	500
	2019-08-01	8.68	5.65	30.2	21.9	4.37	3.85	500
	2019-09-01	7.24	18.99	34	24.5	5.7	3.86	500
	2019-10-01	7.16	18.48	53.7	19.9	2.23	3.3	500
	2019-11-01	12.3	21.48	48.6	19.5	4.59	5.19	500
	2019-12-01	13.5	22.2	50.2	14.3	4.5	4.57	500
	2020-01-01	11.8	12.7	37.5	9.02	4.26	3.55	500
	2020-02-01	11.9	11.9	42.7	13	4.84	3.74	500
	2020-03-01	11.8	190.4	46.6	11	4.66	3.37	500
	2020-04-01	12.282	191	56.565	13.1	8.03	3.234	500
	2020-05-01	13.9	194	58.005	10.4	7.08	3.23	500
	2020-06-01	15.5	199	61.3	16.9	7.58	3.64	500
	2020-07-01	16.4	199	74.1	17.1	7.39	3.51	500
	2020-08-01	16.3	200	75.7	15.4	7.94	3.75	500
	2020-09-01	17.1	183	75.1	18	17.1	3.74	500
	2020-10-01	19.6	306	94.7	23.7	14.3	4.61	500
	2020-11-01	18.3	339	120	34.4	17.6	5.42	500
	2020-12-01	20.4	214	128	21.3696	16.2	6.64	500
	2021-01-01	32.6	256	151	4.85	14.1	6.94	500
	2021-02-01	7.96	168	12.8	7.35	4.34	4.47	500
	2021-03-01	9.121	196.756	9.4	12	4.3	4.49	500
	2021-04-01	10.53	164	13.7	17.7	5.08	4.27	500
	2021-05-01	11.5	213	25.2	20.2	20.4	4.546	500
	2021-06-01	12.328	209	30.11	13.83	32.4	5.05	500
	2021-07-01	15.5	204	24.2	22.9034	39.2	7.66	500
	2021-08-01	14.6	186	27.9	8.6	33.7	7.62	500
	2021-09-01	14.4	187.641	32.2	19.1	36.3	5.84	500
	2021-10-01	14.575	208	41.038	23.7	6.4	7.88	500
	2021-11-01	13.7	205	47.6	28.1	8.48	7.62	500
	2021-12-01	8.48	60.7	47.7	11.3	6	5.3	500

## Sheet: Na
		GR S12	GR S26	GR S21	GR S23	TD SW01	GR S13	Limit
	2017-01-01	6.4	32.9	9.4	10.9	9.6	7.9	2000
	2017-02-01	10.2	34	11.4	16.5	11	11.5	2000
	2017-03-01	7.1	42.6	10.4	17.9	7.3	9.3	2000
	2017-04-01	8.6	31.1	10.7	12	7.7	6	2000
	2017-05-01	8.4	34.1	10.4	10.9	7.4	7.5	2000
	2017-06-01	9.8	30.5	12.1	12.4	9.1	8.5	2000
	2017-07-01	6.5	28	8.6	11.1	6.1	9.3	2000
	2017-08-01	9.5	33.4	13.5	50.1	10.8	9.9	2000
	2017-09-01	12.8	31.6	17.7	35.6	12.1	13.3	2000
	2017-10-01	11.6	1	14.5	2.7	12.6	11.5	2000
	2017-11-01	12.7	31	5.65	18.7	24.5	13.1	2000
	2017-12-01	10.1	37.8	17.1	25.3	9.1	11.3	2000
	2018-01-01	5.4	27.5	8.2	8.3	7.3	5.8	2000
	2018-02-01	7	33.8	6.7	12.1	9.7	6.3	2000
	2018-03-01	8.5	29.7	9.2	12.8	13.6	6.1	2000
	2018-04-01	10.6	30.5	11.7	12.6	8.7	7.3	2000
	2018-05-01	9.8	30.5	11.7	15.5	10.1	8.4	2000
	2018-06-01	10.1	31.9	11.4	28.3	9	7.8	2000
	2018-07-01	14.4	62.1	14.4	72.1	17.7	10	2000
	2018-08-01	12.1	31.8	14.9	15.5	11.9	10.6	2000
	2018-09-01	15.5	45.6	20.1	18.1	13.5	14.5	2000
	2018-10-01	12.6	20.9	18.1	14.4	12.4	13.6	2000
	2018-11-01	12.5	21.4	18.4	14.8	13	14.3	2000
	2018-12-01	14.1	26.4	18.6	14.3	12.6	14.1	2000
	2019-01-01	12.7	25.3	16.2	14.3	11.4	12.8	2000
	2019-02-01	12.6	23.8	14.4	13.2	10.3	12.3	2000
	2019-03-01	13.7	29.7	16.5	35.5	10.9	12.7	2000
	2019-04-01	13.8	30	17.9	14.4	11.1	11.3	2000
	2019-05-01	13.8	35.4	16.6	50.7	10.3	11	2000
	2019-06-01	15.5	32.9	17.6	46.5	12.2	12.3	2000
	2019-07-01	14.9	34	18.1	76.6	14.2	11.6	2000
	2019-08-01	18.5	42.6	21.2	58.6	12.8	14.3	2000
	2019-09-01	17.9	31.1	19.5	95	10.4	13	2000
	2019-10-01	20.8	29.25	21.6	70	12.3	16.1	2000
	2019-11-01	26.2	24.24	21.3	65.6	12.8	18.7	2000
	2019-12-01	15.5	18.7	22.7	35.9	11.4	12.3	2000
	2020-01-01	15.3	21.4	19	11.3	10.6	13.5	2000
	2020-02-01	14.1	26.9	21.6	60.4	11.6	10.9	2000
	2020-03-01	13.6	34	21.2	21	10.7	9.94	2000
	2020-04-01	10.9	33.4	17.8	16.4	9.15	7.09	2000
	2020-05-01	12.8	36.882	20.1	46.684	10	8.46	2000
	2020-06-01	12.3	31.7	23.1	68.4	8.89	9.07	2000
	2020-07-01	14.3	31.9	22.9	69	8.79	8.85	2000
	2020-08-01	14.6	30.8	25	41.2	8.54	9.35	2000
	2020-09-01	19.6	34.1	27.4	55.9	12.4	13.2	2000
	2020-10-01	19.4	55	30	61.2	9.54	14.6	2000
	2020-11-01	24.1	49.1	41.5	93.3	9.4	15.2	2000
	2020-12-01	26	31.4	39.4	40.7721	7.13	15.5	2000
	2021-01-01	36.8	45.5	40	8.38	7.02	17.6	2000
	2021-02-01	8.24	29.8	11.3	8.4	6.95	7.46	2000
	2021-03-01	8.47	32.2	10.9	9.92	6.25	6.32	2000
	2021-04-01	8.82	39.9	19.6	68.9	7.23	6.82	2000
	2021-05-01	9.78	33.3	13.4	72.9	10.1	6.846	2000
	2021-06-01	10.4842	31.2	17.95	66.84	12.8	7.48	2000
	2021-07-01	11.1	32.1	14.4	44.583	14.21	9.17	2000
	2021-08-01	11.6	32.5	14.9	10.1	13.8	9.22	2000
	2021-09-01	14.2	31.386	18.1	20.7	11.7	10.2	2000
	2021-10-01	11.33	37.881	19.5	25.7	8.54	8.46	2000
	2021-11-01	10.87	36.1	24.4	29.8	9.02	8.57	2000
	2021-12-01	4.04	8.86	22.1	9.15	5.32	2.7	2000

## Sheet: SO4
		GR S12	GR S26	GR S21	GR S23	TD SW01	GR S13	Limit
	2017-01-01	19.7	1338.3	65.9	38.25	11.5	8.1	80
	2017-02-01	17	1590.4	60.6	47.9	7.1	6.8	80
	2017-03-01	33.7	1538.4	17.9	55.9	15.3	18.9	80
	2017-04-01	21.5	1208	59.2	41.3	6.4	14.5	80
	2017-05-01	25	1504	19.8	50.9	12.5	16.1	80
	2017-06-01	19.5	1531	109.6	75.5	14	16.7	80
	2017-07-01	20.5	1440.2	14.4	70.4	13.2	16.9	80
	2017-08-01	17	1535	146.8	30	8.9	15.2	80
	2017-09-01	19.4	1565	155.7	14.7	9.2	23.4	80
	2017-10-01	16.1	1572.7	159	290.6	23.2	18.8	80
	2017-11-01	31	1471.8	124	82	18.5	25.6	80
	2017-12-01	51.8	1102.5	181.8	83.7	11.7	27.8	80
	2018-01-01	32.9	1309.7	45.9	11.7	7.7	19.5	80
	2018-02-01	15.7	1245.7	56.1	124.1	11.7	19.3	80
	2018-03-01	18.5	812.4	39.3	14.3	3.1	14.3	80
	2018-04-01	28.8	1531	74.7	73.3	14.2	17.1	80
	2018-05-01	29.7	1134	57.8	85.3	15	18.5	80
	2018-06-01	26.5	1449	101.6	73.3	17.6	18.4	80
	2018-07-01	29.1	2993.5	119.9	34.6	24.1	18.3	80
	2018-08-01	42.3	1358	145.2	90	21.2	23.4	80
	2018-09-01	38.6	1241	183	78.3	23.1	35.7	80
	2018-10-01	94.3	30.1	165	78.1	26.5	54.7	80
	2018-11-01	70.3	16.2	132	46.9	29.3	43.3	80
	2018-12-01	52.7	8.25	109	20.1	20.7	33.3	80
	2019-01-01	30.3	7.19	91.9	65.7	18.8	31.3	80
	2019-02-01	56.2	5.75	75.7	36.6	21.2	28.2	80
	2019-03-01	34	7.57	75.6	8.26	16.6	28.5	80
	2019-04-01	29.7	18.7	104	63.3	21.3	27	80
	2019-05-01	28.7	52.9	108	43.5	18.9	26.9	80
	2019-06-01	34.6	57.96	122	44.9	20.8	30.6	80
	2019-07-01	36.7	78.95	137	282	20.2	32.2	80
	2019-08-01	28.3	152.36	168	22	23.1	36	80
	2019-09-01	24.6	168.2	193	320	18.5	36.9	80
	2019-10-01	16.3	178.22	403	11.8	24.4	32.2	80
	2019-11-01	53.2	184.88	381	-1	32.5	58.6	80
	2019-12-01	147	190	400	96	35.8	57.2	80
	2020-01-01	128	84.9	299	94	29.8	31	80
	2020-02-01	106	51.6	378	9.1	24.9	25.8	80
	2020-03-01	85.4	1590.4	439	81.3	24.7	26	80
	2020-04-01	57.601	1535	515	104	11.3	26.1	80
	2020-05-01	90.3	1609.67	539	34.2	16	25.7	80
	2020-06-01	92.5	1597	588	48	16.9	25.8	80
	2020-07-01	85.8	1515	608	31.2	18.2	28.3	80
	2020-08-01	99.1	1499	691	43.3	17.7	29.5	80
	2020-09-01	112	1504	771	67.5	4.18	40.2	80
	2020-10-01	113	2191	881	34.7	14.6	42.2	80
	2020-11-01	102	2274	1072	169	17.2	42.8	80
	2020-12-01	120	1659	1174	95.4	16.4	51	80
	2021-01-01	315	1884	1495	55.8	15.4	53.7	80
	2021-02-01	73.8	1310	92.6	60	20.5	29.4	80
	2021-03-01	74	1499.07	53.1	65.4	13.1	16.8	80
	2021-04-01	79.9	1566	125	1.56	11.1	18.4	80
	2021-05-01	80.84	1707	163.74	11.4	36.7	20.006	80
	2021-06-01	94	1689	190	62.4	86.2	9.82	80
	2021-07-01	114	1594	180	90.9	125	36	80
	2021-08-01	118	1603.22	205	51.1	101	40.4	80
	2021-09-01	122.18	1443.42	238	237.6	87.1	35.8	80
	2021-10-01	129.295	1694.33	325.872	321.51	35.5	72.4	80
	2021-11-01	130	1584	362	320	40.4	68.1	80
	2021-12-01	65.9	438	354	87.3	38.8	36.9	80

## Sheet: Al
		GR S12	GR S26	GR S21	GR S23	TD SW01	GR S13	Limit
	2017-01-01	0	0.12	0.06	0	0.13	0.38	5
	2017-02-01	0.06	0.06	0	0.05	0	0.12	5
	2017-03-01	0.05	0	0.3	0.07	0.18	0.22	5
	2017-04-01	0.06	0.08	0.09	0	0.09	0.12	5
	2017-05-01	0.04	0.01	0.07	0.04	0.05	0.15	5
	2017-06-01	0	0.08	0	0.16	0	0.33	5
	2017-07-01	0	0.07	0.22	0	0	0.6	5
	2017-08-01	0.05	0.01	0.14	0.12	0	1.39	5
	2017-09-01	0.07	0.15	0.06	0	0.07	1.59	5
	2017-10-01	0.07	0.11	0.07	0.14	0.17	0.12	5
	2017-11-01	1.09	0.11	0.1626	0	0.09	0.13	5
	2017-12-01	0.05	0.12	0.12	0.05	0.08	0.3	5
	2018-01-01	0.08	0.1	0.15	0	0.09	1.3	5
	2018-02-01	0.81	0.09	0	0.07	0.11	1.34	5
	2018-03-01	0.05	0.1	0.11	0.09	0.12	0.29	5
	2018-04-01	0.05	0.08	0.05	0.05	0.05	0.16	5
	2018-05-01	0	0.08	0	0	0.73	0.22	5
	2018-06-01	0.05	0.11	0.05	0.18	0.05	0.3	5
	2018-07-01	0.05	0.05	0.05	0.05	0.05	0.44	5
	2018-08-01	0.05	0.06	0.05	0.05	0.05	0.51	5
	2018-09-01	0.04	0.04	0.12	0.04	0.44	0.16	5
	2018-10-01	0.11	0.05	0.09	0.25	3.31	0.54	5
	2018-11-01	0.03	0.04	0.04	0.03	0.67	0.18	5
	2018-12-01	0.01	0.04	0.03	0.01	0.06	0.14	5
	2019-01-01	0.02	0.02	0.01	0.02	0.02	0.07	5
	2019-02-01	0.04	0.04	0.02	0.03	2.43	0.62	5
	2019-03-01	0.02	0.01	0.02	0.01	0.55	0.27	5
	2019-04-01	0.02	0.03	0.01	0.02	2.52	1.81	5
	2019-05-01	0.03	0.04	0.02	0.01	0.77	1.25	5
	2019-06-01	0.02	0.12	0.03	0.03	1.64	1.27	5
	2019-07-01	0.02	0.06	0.03	0.13	1.11	0.68	5
	2019-08-01	0.07	0	0.02	0.02	4.9	0.32	5
	2019-09-01	0.04	0.08	0.04	0.14	2.22	0.45	5
	2019-10-01	0.06	0.02	0.04	0.07	2.18	0.66	5
	2019-11-01	0.06	0.025	0.04	0.03	4.13	1.1	5
	2019-12-01	0.03	0.03	1.81	0.1	3.58	0.77	5
	2020-01-01	0.03	0.04	1.29	0.03	3.56	0.38	5
	2020-02-01	0.02	0.01	2.23	0.03	2.25	0.15	5
	2020-03-01	0.01	0.06	5.19	0.03	1.15	0.4	5
	2020-04-01	0.01	0.01	7.536	0.01	0.01	0.2	5
	2020-05-01	0.03	0.01	9.128	0.01	0.01	0.44	5
	2020-06-01	0.01	0.01	8.62	0.02	0.07	0.33	5
	2020-07-01	0.01	0.01	9.5	0.01	0.08	1.14	5
	2020-08-01	0.01	0.01	8.39	0.01	0.03	0.3	5
	2020-09-01	0.01	0.01	6.22	0.01	0.01	0.24	5
	2020-10-01	0.01	0.01	11.7	0.02	0.09	0.01	5
	2020-11-01	0.01	0.2	15.1	0.01	0.01	0.01	5
	2020-12-01	0.01	0.01	20.5	0.31	0.01	0.15	5
	2021-01-01	0.01	0.01	41.4	0.11	0.11	0.27	5
	2021-02-01	0.3	0.01	0.46	0.14	1.38	0.01	5
	2021-03-01	0.03	0.01	0.13	0.01	1.32	1.097	5
	2021-04-01	0.21	0.92	0.37	0.23	0.86	2	5
	2021-05-01	0.02	0.01	0.11	0.01	0.01	2.52	5
	2021-06-01	0.01	0.01	0.01	0.01	0.01	0.24	5
	2021-07-01	0.02	0.02	0.15	0.16	0.01	0.73	5
	2021-08-01	0.02	0.01	0.33	0.11	0.01	1.24	5
	2021-09-01	0.02	0.01	0.28	0	0.01	1.804	5
	2021-10-01	0.11	0.01	0.47	0.02	0.17	2.46	5
	2021-11-01	0.01	0.01	0.16	0.01	0.03	2.51	5
	2021-12-01	0.08	0.29	0.19	0.02	1.89	6.05	5

## Sheet: Fe
		GR S12	GR S26	GR S21	GR S23	TD SW01	GR S13	Limit
	2017-01-01	0.2	0.2	0.2	0.6	0.9	1.9	0.3
	2017-02-01	0.2	0	0.8	5.9	0.1	1.3	0.3
	2017-03-01	0.2	0	0.3	0.8	0.6	0.6	0.3
	2017-04-01	0.5	0.1	1.5	1.5	0.7	0.6	0.3
	2017-05-01	0.3	0.03	0.4	1.2	0.5	0.6	0.3
	2017-06-01	0.3	0.06	0.1	0.6	0.4	0.7	0.3
	2017-07-01	0.3	0.7	18.1	0.7	0.2	1	0.3
	2017-08-01	0.6	0.58	0.1	3.1	0.3	1.3	0.3
	2017-09-01	0.3	0.12	0.1	2.5	0.2	2.1	0.3
	2017-10-01	0.6	0.5	0.2	0.4	0.7	0.2	0.3
	2017-11-01	1.1	0.3	1.5664	0.4	0.7	0.3	0.3
	2017-12-01	0.06	0.25	0.05	0.29	0.48	0.33	0.3
	2018-01-01	0.3	1.1	0.4	0.2	0.6	2.3	0.3
	2018-02-01	3.1	0.8	0.1	0.8	1	2.2	0.3
	2018-03-01	10	0.1	4	0.8	1.9	0.8	0.3
	2018-04-01	0.22	0.06	0.13	0.61	0.4	0.36	0.3
	2018-05-01	0.1	0.2	0.6	0.5	0.8	0.5	0.3
	2018-06-01	0.08	0.1	0.05	0.29	0.23	0.35	0.3
	2018-07-01	0.34	0.05	0.05	0.28	0.21	0.46	0.3
	2018-08-01	0.79	0.06	0.11	0.09	0.37	0.77	0.3
	2018-09-01	0.2	0.06	0.28	0.18	0.89	0.32	0.3
	2018-10-01	0.24	0.37	0.2	0.25	2.06	0.72	0.3
	2018-11-01	0.16	4.37	0.52	0.23	0.58	0.57	0.3
	2018-12-01	0.25	5.63	0.02	0.02	0.31	1.05	0.3
	2019-01-01	0.24	3.37	0.1	0.12	0.14	0.26	0.3
	2019-02-01	0.17	2.04	0.08	0.74	1.78	1.23	0.3
	2019-03-01	0.22	0.96	2.11	1.19	1.08	0.94	0.3
	2019-04-01	0.12	0.56	0.16	0.32	1.46	1.28	0.3
	2019-05-01	0.41	0.23	0.29	0.51	0.74	1.414	0.3
	2019-06-01	0.58	0.2	0.33	1.04	1.18	1.36	0.3
	2019-07-01	0.5	0	0.28	1.24	1.08	0.83	0.3
	2019-08-01	1.32	0	0.19	0.85	2.96	0.67	0.3
	2019-09-01	0.56	0.1	0.21	0.29	1.63	0.76	0.3
	2019-10-01	0.62	0.485	0.33	0.54	2.44	0.83	0.3
	2019-11-01	0.43	0.158	0.25	1.43	3.19	0.85	0.3
	2019-12-01	0.17	0.11	0.06	1.31	2.31	0.86	0.3
	2020-01-01	0.13	1.07	0.19	0.1	2.71	1.43	0.3
	2020-02-01	0.08	0.28	0.14	1.23	1.72	0.78	0.3
	2020-03-01	0.17	0	1.61	0.41	0.97	1.09	0.3
	2020-04-01	0.02	0.58	2.72	0.34	0.44	0.75	0.3
	2020-05-01	0.3	0.23	2.82	0.79	0.62	0.86	0.3
	2020-06-01	0.01	0.01	9.57	1.33	0.02	0.65	0.3
	2020-07-01	0.23	0.24	4.53	0.25	0.18	1.94	0.3
	2020-08-01	0.08	0.55	11.2	0.18	0.15	0.99	0.3
	2020-09-01	0.08	0.03	7.33	0.28	0.97	0.37	0.3
	2020-10-01	0.2	0.1	7.34	0.72	0.11	0.06	0.3
	2020-11-01	0.06	0.12	6.08	0.84	0.07	0.02	0.3
	2020-12-01	0.02	0.01	6.11	0.27	0.02	0.3	0.3
	2021-01-01	0.06	0.04	12.3	0.1	0.25	0.28	0.3
	2021-02-01	0.4	0.02	0.57	0.23	1.15	0.01	0.3
	2021-03-01	0.49	0.01	1.52	1.19	2.56	1.621	0.3
	2021-04-01	0.3	0.01	0.23	2.49	1.34	2.93	0.3
	2021-05-01	0.32	0.01	0.09	3.86	1.03	1.151	0.3
	2021-06-01	0.05	0.01	0.01	0.42	0.14	0.5	0.3
	2021-07-01	0.03	0.01	0.03	0.44	0.1	0.81	0.3
	2021-08-01	0.01	0.01	0.02	0.8	0.16	0.94	0.3
	2021-09-01	0.01	0.01	0.02	0.1	0.07	1.569	0.3
	2021-10-01	0.01	0.01	0.03	0.01	0.19	1.05	0.3
	2021-11-01	0.37	0.01	0.01	0.01	0.11	1.87	0.3
	2021-12-01	0.28	0.21	0.08	0.5	1.34	3.28	0.3

## Sheet: Mn
		GR S12	GR S26	GR S21	GR S23	TD SW01	GR S13	Limit
	2017-01-01	0	0.9	0	0.1	0	0	0.18
	2017-02-01	0	0.2	2.2	1.7	0	0	0.18
	2017-03-01	0	0	0	0.1	0	0	0.18
	2017-04-01	0	0	0.4	4.3	0.8	0	0.18
	2017-05-01	0	0.19	0.1	0.7	0.1	0	0.18
	2017-06-01	0	10.1	0	0.4	0	0	0.18
	2017-07-01	0	1.3	2.4	0.3	0	0	0.18
	2017-08-01	0	0.09	0	1.5	0	0	0.18
	2017-09-01	0	0.75	0	5.1	0	0	0.18
	2017-10-01	0	6.8	0	4.6	0	0	0.18
	2017-11-01	0	6.8	0.04	0.3	0	0	0.18
	2017-12-01	0.05	6.25	0.05	0.06	0.05	0.05	0.18
	2018-01-01	0	6.8	0	2.6	0.6	0	0.18
	2018-02-01	0.1	5.3	0	2.5	0.4	0.1	0.18
	2018-03-01	0.1	4	1.4	0.3	0.4	0.1	0.18
	2018-04-01	0.05	10.1	0.05	0.37	0.05	0.05	0.18
	2018-05-01	0	9.5	0	0.1	0	0	0.18
	2018-06-01	0.05	4.34	0.05	0.05	0.05	0.05	0.18
	2018-07-01	0.05	62.43	0.05	1.74	0.05	0.05	0.18
	2018-08-01	0.05	2.38	0.05	0.05	0.05	0.05	0.18
	2018-09-01	0.01	12.2	0.01	0.24	0.01	0.01	0.18
	2018-10-01	0.02	0.06	0.01	0.07	0.01	0.07	0.18
	2018-11-01	0.02	0.02	0.16	0.11	0.02	0.05	0.18
	2018-12-01	0.01	0.01	0.01	0.01	0.01	0.01	0.18
	2019-01-01	0.01	0.01	0.03	0.15	0.01	0.01	0.18
	2019-02-01	0.01	0.02	0.01	0.22	0.01	0.01	0.18
	2019-03-01	0.01	0.26	0.07	6.07	0.03	0.01	0.18
	2019-04-01	0.01	0.33	0.12	0.24	0.01	0.06	0.18
	2019-05-01	0.01	2.07	0.16	0.86	0.01	0.04	0.18
	2019-06-01	0.02	0.9	0.13	0.72	0.02	0.03	0.18
	2019-07-01	0.05	0.2	0.33	1.65	0.01	0.03	0.18
	2019-08-01	0.09	0	0.2	0.06	0.02	0.05	0.18
	2019-09-01	0.04	0	0.24	10.2	0.01	0.03	0.18
	2019-10-01	0.05	0	2	0.03	0.02	0.1	0.18
	2019-11-01	0.02	0	1	0.07	0.01	0.13	0.18
	2019-12-01	0.27	0.54	5.02	0.9	0.02	0.03	0.18
	2020-01-01	0.01	0.05	4.41	0.64	0.01	0.01	0.18
	2020-02-01	0.01	0.01	5.14	3	0.03	0.01	0.18
	2020-03-01	0.01	0.2	5.91	0.31	0.01	0.01	0.18
	2020-04-01	0.01	0.09	7.446	0.74	0.01	0.01	0.18
	2020-05-01	0.01	2.1	7.598	0.1	0.01	0.1	0.18
	2020-06-01	0.01	0.13	8.3	0.15	0.01	0.03	0.18
	2020-07-01	0.01	0.2	8.96	0.01	0.01	0.01	0.18
	2020-08-01	0.29	0.17	9.15	0.29	0.01	0.03	0.18
	2020-09-01	0.02	0.19	9.03	0.2	0.23	0.01	0.18
	2020-10-01	0.04	0.26	10.6	0.91	0.03	0.01	0.18
	2020-11-01	0.01	38.2	17.3	3.85	0.01	0.05	0.18
	2020-12-01	0.01	0.26	15.1	0.18	0.01	0.14	0.18
	2021-01-01	1.29	21.8	0.24	0.09	0.02	0.17	0.18
	2021-02-01	0.38	0.62	0.16	0.17	0.01	0.01	0.18
	2021-03-01	0.01	0.06	0.01	0.7	0.01	0.03	0.18
	2021-04-01	0.19	0.02	0.09	1.41	0.01	0.01	0.18
	2021-05-01	0.01	0.04	1.25	1.96	0.09	0.02	0.18
	2021-06-01	0.01	0.01	1.11	0.17	0.01	0.01	0.18
	2021-07-01	0.64	0.01	1.69	0.06	0.01	0.01	0.18
	2021-08-01	1.47	0.01	1.6	0	0.01	0.01	0.18
	2021-09-01	1.62	0.01	1.79	4.1	0.01	0.01	0.18
	2021-10-01	1.07	0.01	2.663	12.9	0.01	0.06	0.18
	2021-11-01	0.18	0.01	3.01	13.2	0.01	0.01	0.18
	2021-12-01	0.01	0.2	2.74	0.01	0.01	0.07	0.18
