# Supplementary material for: Evaluation of the impact of coal mining on surface water in the Boesmanspruit, Mpumalanga, South Africa
Source: Springer Nature journal article supplement (doi:10.1007/s12665-024-11431-6), 2024-03-01
Supplement: MOESM4 [file 26822346]

**Factor Analysis**

| **Notes** | | |
| --- | --- | --- |
| Output Created | | 22-FEB-2023 09:37:07 |
| Comments | |  |
| Input | Active Dataset | DataSet3 |
| Filter | <none> |
| Weight | <none> |
| Split File | <none> |
| N of Rows in Working Data File | 60 |
| Missing Value Handling | Definition of Missing | MISSING=EXCLUDE: User-defined missing values are treated as missing. |
| Cases Used | LISTWISE: Statistics are based on cases with no missing values for any variable used. |
| Syntax | | FACTOR /VARIABLES pH ECmSm TDSmgl Camgl Mgmgl Namgl SO4mgl Almgl Femgl Mnmgl /MISSING LISTWISE /ANALYSIS pH ECmSm TDSmgl Camgl Mgmgl Namgl SO4mgl Almgl Femgl Mnmgl /PRINT INITIAL CORRELATION KMO EXTRACTION ROTATION FSCORE /PLOT EIGEN ROTATION /CRITERIA MINEIGEN(1) ITERATE(25) /EXTRACTION PC /CRITERIA ITERATE(25) /ROTATION VARIMAX /METHOD=CORRELATION. |
| Resources | Processor Time | 00:00:00.28 |
| Elapsed Time | 00:00:00.22 |
| Maximum Memory Required | 13688 (13.367K) bytes |

| **Correlation Matrix** | | | | | | | | | | | | |
| --- | --- | --- | --- | --- | --- | --- | --- | --- | --- | --- | --- | --- |
|  | | pH | EC mS/m | TDS mg/l | Ca mg/l | Mg mg/l | Na mg/l | SO4 mg/l | Al mg/l | Fe mg/l | Mn mg/l |
| Correlation | pH | 1.000 | .039 | .010 | .007 | .027 | .078 | .010 | -.112 | -.114 | -.045 |
| EC mS/m | .039 | 1.000 | .964 | .973 | .976 | .738 | .983 | -.080 | -.242 | .490 |
| TDS mg/l | .010 | .964 | 1.000 | .943 | .989 | .765 | .990 | -.110 | -.241 | .526 |
| Ca mg/l | .007 | .973 | .943 | 1.000 | .947 | .724 | .961 | -.096 | -.244 | .397 |
| Mg mg/l | .027 | .976 | .989 | .947 | 1.000 | .748 | .993 | -.075 | -.235 | .565 |
| Na mg/l | .078 | .738 | .765 | .724 | .748 | 1.000 | .730 | -.214 | -.148 | .416 |
| SO4 mg/l | .010 | .983 | .990 | .961 | .993 | .730 | 1.000 | -.083 | -.244 | .522 |
| Al mg/l | -.112 | -.080 | -.110 | -.096 | -.075 | -.214 | -.083 | 1.000 | .123 | .060 |
| Fe mg/l | -.114 | -.242 | -.241 | -.244 | -.235 | -.148 | -.244 | .123 | 1.000 | -.086 |
| Mn mg/l | -.045 | .490 | .526 | .397 | .565 | .416 | .522 | .060 | -.086 | 1.000 |

| **KMO and Bartlett's Test** | | |
| --- | --- | --- |
| Kaiser-Meyer-Olkin Measure of Sampling Adequacy. | | .846 |
| Bartlett's Test of Sphericity | Approx. Chi-Square | 939.267 |
| df | 45 |
| Sig. | <.001 |

| **Communalities** | | |
| --- | --- | --- |
|  | Initial | Extraction |
| pH | 1.000 | .424 |
| EC mS/m | 1.000 | .959 |
| TDS mg/l | 1.000 | .972 |
| Ca mg/l | 1.000 | .914 |
| Mg mg/l | 1.000 | .981 |
| Na mg/l | 1.000 | .665 |
| SO4 mg/l | 1.000 | .975 |
| Al mg/l | 1.000 | .488 |
| Fe mg/l | 1.000 | .307 |
| Mn mg/l | 1.000 | .421 |
| Extraction Method: Principal Component Analysis. | | |

| **Total Variance Explained** | | | | | | | | | |
| --- | --- | --- | --- | --- | --- | --- | --- | --- | --- |
| Component | Initial Eigenvalues | | | Extraction Sums of Squared Loadings | | | Rotation Sums of Squared Loadings | | |
| Total | % of Variance | Cumulative % | Total | % of Variance | Cumulative % | Total | % of Variance | Cumulative % |
| 1 | 5.874 | 58.745 | 58.745 | 5.874 | 58.745 | 58.745 | 5.782 | 57.816 | 57.816 |
| 2 | 1.231 | 12.308 | 71.053 | 1.231 | 12.308 | 71.053 | 1.324 | 13.237 | 71.053 |
| 3 | .908 | 9.082 | 80.135 |  |  |  |  |  |  |
| 4 | .867 | 8.675 | 88.810 |  |  |  |  |  |  |
| 5 | .682 | 6.818 | 95.628 |  |  |  |  |  |  |
| 6 | .350 | 3.499 | 99.127 |  |  |  |  |  |  |
| 7 | .058 | .579 | 99.705 |  |  |  |  |  |  |
| 8 | .019 | .194 | 99.899 |  |  |  |  |  |  |
| 9 | .006 | .063 | 99.962 |  |  |  |  |  |  |
| 10 | .004 | .038 | 100.000 |  |  |  |  |  |  |
| Extraction Method: Principal Component Analysis. | | | | | | | | | |

| **Component Matrix**a | | |
| --- | --- | --- |
|  | Component | |
| 1 | 2 |
| pH | .036 | -.650 |
| EC mS/m | .979 | .024 |
| TDS mg/l | .985 | .030 |
| Ca mg/l | .956 | .006 |
| Mg mg/l | .989 | .054 |
| Na mg/l | .808 | -.107 |
| SO4 mg/l | .986 | .047 |
| Al mg/l | -.126 | .687 |
| Fe mg/l | -.281 | .477 |
| Mn mg/l | .575 | .301 |
| Extraction Method: Principal Component Analysis.a | | |
| a. 2 components extracted. | | |

| **Rotated Component Matrix**a | | |
| --- | --- | --- |
|  | Component | |
| 1 | 2 |
| pH | -.056 | -.649 |
| EC mS/m | .973 | -.115 |
| TDS mg/l | .980 | -.110 |
| Ca mg/l | .947 | -.130 |
| Mg mg/l | .987 | -.087 |
| Na mg/l | .785 | -.221 |
| SO4 mg/l | .983 | -.093 |
| Al mg/l | -.027 | .698 |
| Fe mg/l | -.211 | .512 |
| Mn mg/l | .612 | .216 |
| Extraction Method: Principal Component Analysis. Rotation Method: Varimax with Kaiser Normalization. a | | |
| a. Rotation converged in 3 iterations. | | |

| **Component Transformation Matrix** | | |
| --- | --- | --- |
| Component | 1 | 2 |
| 1 | .990 | -.141 |
| 2 | .141 | .990 |
| Extraction Method: Principal Component Analysis. Rotation Method: Varimax with Kaiser Normalization. | | |

| **Component Score Coefficient Matrix** | | |
| --- | --- | --- |
|  | Component | |
| 1 | 2 |
| pH | -.069 | -.524 |
| EC mS/m | .168 | -.005 |
| TDS mg/l | .169 | .000 |
| Ca mg/l | .162 | -.018 |
| Mg mg/l | .173 | .020 |
| Na mg/l | .124 | -.106 |
| SO4 mg/l | .172 | .014 |
| Al mg/l | .058 | .556 |
| Fe mg/l | .007 | .391 |
| Mn mg/l | .131 | .228 |
| Extraction Method: Principal Component Analysis. Rotation Method: Varimax with Kaiser Normalization. | | |

| **Component Score Covariance Matrix** | | |
| --- | --- | --- |
| Component | 1 | 2 |
| 1 | 1.000 | .000 |
| 2 | .000 | 1.000 |
| Extraction Method: Principal Component Analysis. Rotation Method: Varimax with Kaiser Normalization. | | |

**Proximities**

| **Notes** | | |
| --- | --- | --- |
| Output Created | | 22-FEB-2023 09:38:22 |
| Comments | |  |
| Input | Active Dataset | DataSet3 |
| Filter | <none> |
| Weight | <none> |
| Split File | <none> |
| N of Rows in Working Data File | 60 |
| Missing Value Handling | Definition of Missing | User-defined missing values are treated as missing. |
| Cases Used | Statistics are based on cases with no missing values for any variable used. |
| Syntax | | PROXIMITIES pH ECmSm TDSmgl Camgl Mgmgl Namgl SO4mgl Almgl Femgl Mnmgl /MATRIX OUT(D0.3498608592991759) /VIEW=VARIABLE /MEASURE=RESCALE SEUCLID /PRINT NONE /STANDARDIZE=VARIABLE Z. |
| Resources | Processor Time | 00:00:00.00 |
| Elapsed Time | 00:00:00.00 |
| Workspace Bytes | 776 |
| Files Saved | Matrix File | Dataset D0.3498608592991759 |

| **Case Processing Summary**a | | | | | |
| --- | --- | --- | --- | --- | --- |
| Cases | | | | | |
| Valid | | Missing | | Total | |
| N | Percent | N | Percent | N | Percent |
| 60 | 100.0% | 0 | 0.0% | 60 | 100.0% |
| a. Rescaled Squared Euclidean Distance used | | | | | |

**Cluster**

| **Notes** | | |
| --- | --- | --- |
| Output Created | | 22-FEB-2023 09:38:22 |
| Comments | |  |
| Input | Active Dataset | DataSet3 |
| Filter | <none> |
| Weight | <none> |
| Split File | <none> |
| N of Rows in Working Data File | 60 |
| Matrix Input | Dataset D0.3498608592991759 |
| Missing Value Handling | Definition of Missing | User-defined missing values are treated as missing. |
| Cases Used | Statistics are based on cases with no missing values for any variable used. |
| Syntax | | CLUSTER /MATRIX IN(D0.3498608592991759) /METHOD WARD /PRINT SCHEDULE /PLOT DENDROGRAM VICICLE. |
| Resources | Processor Time | 00:00:00.25 |
| Elapsed Time | 00:00:00.27 |

**Ward Linkage**

| **Agglomeration Schedule** | | | | | | |
| --- | --- | --- | --- | --- | --- | --- |
| Stage | Cluster Combined | | Coefficients | Stage Cluster First Appears | | Next Stage |
| Cluster 1 | Cluster 2 | Cluster 1 | Cluster 2 |
| 1 | 5 | 7 | .000 | 0 | 0 | 2 |
| 2 | 3 | 5 | .002 | 0 | 1 | 4 |
| 3 | 2 | 4 | .009 | 0 | 0 | 4 |
| 4 | 2 | 3 | .033 | 3 | 2 | 5 |
| 5 | 2 | 6 | .197 | 4 | 0 | 6 |
| 6 | 2 | 10 | .520 | 5 | 0 | 9 |
| 7 | 8 | 9 | .872 | 0 | 0 | 8 |
| 8 | 1 | 8 | 1.350 | 0 | 7 | 9 |
| 9 | 1 | 2 | 2.453 | 8 | 6 | 0 |

| **Correlations** | | | | | | | | | | | |
| --- | --- | --- | --- | --- | --- | --- | --- | --- | --- | --- | --- |
|  | | pH | EC mS/m | TDS mg/l | Ca mg/l | Mg mg/l | Na mg/l | SO4 mg/l | Al mg/l | Fe mg/l | Mn mg/l |
| pH | Pearson Correlation | 1 | .039 | .010 | .007 | .027 | .078 | .010 | -.112 | -.114 | -.045 |
| Sig. (2-tailed) |  | .765 | .941 | .956 | .837 | .552 | .941 | .394 | .385 | .735 |
| N | 60 | 60 | 60 | 60 | 60 | 60 | 60 | 60 | 60 | 60 |
| EC mS/m | Pearson Correlation | .039 | 1 | .964** | .973** | .976** | .738** | .983** | -.080 | -.242 | .490** |
| Sig. (2-tailed) | .765 |  | <.001 | <.001 | <.001 | <.001 | <.001 | .545 | .063 | <.001 |
| N | 60 | 60 | 60 | 60 | 60 | 60 | 60 | 60 | 60 | 60 |
| TDS mg/l | Pearson Correlation | .010 | .964** | 1 | .943** | .989** | .765** | .990** | -.110 | -.241 | .526** |
| Sig. (2-tailed) | .941 | <.001 |  | <.001 | <.001 | <.001 | <.001 | .403 | .064 | <.001 |
| N | 60 | 60 | 60 | 60 | 60 | 60 | 60 | 60 | 60 | 60 |
| Ca mg/l | Pearson Correlation | .007 | .973** | .943** | 1 | .947** | .724** | .961** | -.096 | -.244 | .397** |
| Sig. (2-tailed) | .956 | <.001 | <.001 |  | <.001 | <.001 | <.001 | .464 | .060 | .002 |
| N | 60 | 60 | 60 | 60 | 60 | 60 | 60 | 60 | 60 | 60 |
| Mg mg/l | Pearson Correlation | .027 | .976** | .989** | .947** | 1 | .748** | .993** | -.075 | -.235 | .565** |
| Sig. (2-tailed) | .837 | <.001 | <.001 | <.001 |  | <.001 | <.001 | .566 | .070 | <.001 |
| N | 60 | 60 | 60 | 60 | 60 | 60 | 60 | 60 | 60 | 60 |
| Na mg/l | Pearson Correlation | .078 | .738** | .765** | .724** | .748** | 1 | .730** | -.214 | -.148 | .416** |
| Sig. (2-tailed) | .552 | <.001 | <.001 | <.001 | <.001 |  | <.001 | .100 | .258 | <.001 |
| N | 60 | 60 | 60 | 60 | 60 | 60 | 60 | 60 | 60 | 60 |
| SO4 mg/l | Pearson Correlation | .010 | .983** | .990** | .961** | .993** | .730** | 1 | -.083 | -.244 | .522** |
| Sig. (2-tailed) | .941 | <.001 | <.001 | <.001 | <.001 | <.001 |  | .528 | .061 | <.001 |
| N | 60 | 60 | 60 | 60 | 60 | 60 | 60 | 60 | 60 | 60 |
| Al mg/l | Pearson Correlation | -.112 | -.080 | -.110 | -.096 | -.075 | -.214 | -.083 | 1 | .123 | .060 |
| Sig. (2-tailed) | .394 | .545 | .403 | .464 | .566 | .100 | .528 |  | .351 | .649 |
| N | 60 | 60 | 60 | 60 | 60 | 60 | 60 | 60 | 60 | 60 |
| Fe mg/l | Pearson Correlation | -.114 | -.242 | -.241 | -.244 | -.235 | -.148 | -.244 | .123 | 1 | -.086 |
| Sig. (2-tailed) | .385 | .063 | .064 | .060 | .070 | .258 | .061 | .351 |  | .516 |
| N | 60 | 60 | 60 | 60 | 60 | 60 | 60 | 60 | 60 | 60 |
| Mn mg/l | Pearson Correlation | -.045 | .490** | .526** | .397** | .565** | .416** | .522** | .060 | -.086 | 1 |
| Sig. (2-tailed) | .735 | <.001 | <.001 | .002 | <.001 | <.001 | <.001 | .649 | .516 |  |
| N | 60 | 60 | 60 | 60 | 60 | 60 | 60 | 60 | 60 | 60 |
| **. Correlation is significant at the 0.01 level (2-tailed). | | | | | | | | | | | |
