# Supplementary material for: Evaluation of the impact of coal mining on surface water in the Boesmanspruit, Mpumalanga, South Africa
Source: Springer Nature journal article supplement (doi:10.1007/s12665-024-11431-6), 2024-03-01
Supplement: MOESM5 [file 26822346]

## Sheet: Sheet1
Dry
DateTimeMeas	pH	EC mS/m	TDS mg/l	Ca mg/l	Mg mg/l	Na mg/l	SO4 mg/l	Al mg/l	Fe mg/l	Mn mg/l	Parameters	pH	EC mS/m	TDS mg/l	Ca mg/l	Mg mg/l	Na mg/l	SO4 mg/l	Al mg/l	Fe mg/l	Mn mg/l		pH	Obj	FT/Obj	Excursion Values	EC mS/m	Obj	FT/Obj	Excursion Values	TDS mg/l	Obj	FT/Obj	Excursion Values	Ca mg/l	Obj	FT/Obj	Excursion Values	Mg mg/l	Obj	FT/Obj	Excursion Values	Na mg/l	Obj	FT/Obj	Excursion Values	SO4 mg/l	Obj	FT/Obj
2017-04-28	6	23.27	79.75	13.1	11.7	10.7	59.2	0.09	1.5	0.4	BIS (Sn)	8	30	500	75	500	2000	80	5	0.75	0.18						33.3	30	1.11	0.11	768.03	500	1.53606	0.536059	77.5	75	1.03333	0.0333333									109.6	80	1.37
2017-05-28	6.5	13.7	34.43	6.1	4.9	10.4	19.8	0.07	0.4	0.1	Exceeding	0	26	6	6	0	0	25	6	8	16						48.1	30	1.60333	0.603333	764.891	500	1.52978	0.529782	76.02	75	1.0136	0.0136									146.8	80	1.835
2017-06-28	6.4	33.3	194.8	21.5	19.7	12.1	109.6	0	0.1	0	Number of Failed Variables(Parameters)	7															43.5	30	1.45	0.45	836	500	1.672	0.672	82.1	75	1.09467	0.0946667									155.7	80	1.94625
2017-07-28	6.6	48.1	165.88	8.4	6.9	8.6	14.4	0.22	18.1	2.4	Total number of Parameters	10															49.6	30	1.65333	0.653333	890	500	1.78	0.78	98.6	75	1.31467	0.314667									101.6	80	1.27
2017-08-28	6.7	43.5	252.38	25.6	25.6	13.5	146.8	0.14	0.1	0	Total number of Tests	300															33.6	30	1.12	0.12	984	500	1.968	0.968	101	75	1.34667	0.346667									119.9	80	1.49875
2017-09-28	6.9	49.6	192.7	31.9	30.7	17.7	155.7	0.06	0.1	0	Total number of failed tests	93															38.5	30	1.28333	0.283333	1120	500	2.24	1.24	148	75	1.97333	0.973333									145.2	80	1.815
2018-04-28	6.72	29.01	95.43	15	14.1	11.7	74.7	-0.05	0.13	-0.05	Total excursion Values	497.538															43	30	1.43333	0.433333																	183	80	2.2875
2018-05-28	6.4	28.08	78.14	13.4	13.5	11.7	57.8	0	0.6	0	F1	70															51.4	30	1.71333	0.713333																	104	80	1.3
2018-06-28	6.61	33.6	124.19	18.9	18	11.4	101.6	-0.05	-0.05	-0.05	F2	31															42.9	30	1.43	0.43																	108	80	1.35
2018-07-28	6.73	38.5	149.45	25.5	24.6	14.4	119.9	-0.05	-0.05	-0.05	nse	1.65846															42.4	30	1.41333	0.413333																	122	80	1.525
2018-08-28	6.82	43	174.15	23.4	22.8	14.9	145.2	-0.05	0.11	-0.05	F3	62.3843															45.8	30	1.52667	0.526667																	137	80	1.7125
2018-09-27	6.63	51.4	334	32.7	30.2	20.1	183	0.12	0.28	0.01	CCME_WQI_DryUpstream	42.9814															48.3	30	1.61	0.61																	168	80	2.1
2019-04-30	6.7	42.9	250	25.6	23.1	17.9	104	0.01	0.16	0.12	Parameters	pH	EC mS/m	TDS mg/l	Ca mg/l	Mg mg/l	Na mg/l	SO4 mg/l	Al mg/l	Fe mg/l	Mn mg/l						52.6	30	1.75333	0.753333																	193	80	2.4125
2019-05-28	7.04	42.4	250	24.8	22.2	16.6	108	0.02	0.29	0.16	Average	5.86033	64.0387	359.136	39.392	31.1993	16.7583	227.781	1.70913	2.045	2.06347						62.2	30	2.07333	1.07333																	515	80	6.4375
2019-06-27	7.41	45.8	296	28.9	24.1	17.6	122	0.03	0.33	0.13	BIS (Sn)	8	30	500	75	500	2000	80	5	0.75	0.18						128	30	4.26667	3.26667																	539	80	6.7375
2019-07-23	7.38	48.3	312	28.5	25.6	18.1	137	0.03	0.28	0.33	PIs=Ci/Si	0.732542	2.13462	0.718271	0.525227	0.0623987	0.00837917	2.84727	0.341827	2.72667	11.4637						137	30	4.56667	3.56667																	588	80	7.35
2019-08-26	7.51	52.6	336	33.4	30.2	21.2	168	0.02	0.19	0.2	1/n	0.1															138	30	4.6	3.6																	608	80	7.6
2019-09-29	7.05	62.2	330	37	34	19.5	193	0.04	0.21	0.24	PI/n	0.0732542	0.213462	0.0718271	0.0525227	0.00623987	0.000837917	0.284727	0.0341827	0.272667	1.14637						148	30	4.93333	3.93333																	691	80	8.6375
2020-04-28	7.85	128	768.03	77.5	56.565	17.8	515	7.536	2.72	7.446	CPI_DryUpstream	2.15609															155	30	5.16667	4.16667																	771	80	9.6375
2020-05-28	3.8	137	764.891	76.02	58.005	20.1	539	9.128	2.82	7.598																	178	30	5.93333	4.93333																	125	80	1.5625
2020-06-28	3.44	138	836	82.1	61.3	23.1	588	8.62	9.57	8.3																	36.5	30	1.21667	0.216667																	163.74	80	2.04675
2020-07-28	3.53	148	890	98.6	74.1	22.9	608	9.5	4.53	8.96																	44.2	30	1.47333	0.473333																	190	80	2.375
2020-08-28	3.62	155	984	101	75.7	25	691	8.39	11.2	9.15																	49.3	30	1.64333	0.643333																	180	80	2.25
2020-09-28	3.14	178	1120	148	75.1	27.4	771	6.22	7.33	9.03																	50.9	30	1.69667	0.696667																	205	80	2.5625
2021-04-28	6.9	36.5	211.89	21.5	13.7	19.6	125	0.37	0.23	0.09																	61	30	2.03333	1.03333																	238	80	2.975
2021-05-28	4.37	44.2	259.926	25.5	25.2	13.4	163.74	0.11	0.09	1.25																	66	30	2.2	1.2
2021-06-28	4.33	49.3	303.939	30.44	30.11	17.95	190	-0.01	0.01	1.11
2021-07-28	4.97	50.9	292.72	33.2	24.2	14.4	180	0.15	0.03	1.69
2021-08-28	3.98	61	323.96	37.6	27.9	14.9	205	0.33	0.02	1.6
2021-09-28	3.78	66	369.41	36.6	32.2	18.1	238	0.28	0.02	1.79
Wet
DateTimeMeas	pH	EC mS/m	TDS mg/l	Ca mg/l	Mg mg/l	Na mg/l	SO4 mg/l	Al mg/l	Fe mg/l	Mn mg/l	Parameters	pH	EC mS/m	TDS mg/l	Ca mg/l	Mg mg/l	Na mg/l	SO4 mg/l	Al mg/l	Fe mg/l	Mn mg/l		pH	Obj	FT/Obj	Excursion Values	EC mS/m	Obj	FT/Obj	Excursion Values	TDS mg/l	Obj	FT/Obj	Excursion Values	Ca mg/l	Obj	FT/Obj	Excursion Values	Mg mg/l	Obj	FT/Obj	Excursion Values	Na mg/l	Obj	FT/Obj	Excursion Values	SO4 mg/l	Obj	FT/Obj
2017-01-28	6.4	23.72	82.94	12.3	11.4	9.4	65.9	0.06	0.2	0	BIS (Sn)	8	30	500	75	500	2000	80	5	0.75	0.18						52.1	30	1.73667	0.736667	660	500	1.32	0.32	145	75	1.93333	0.933333									159	80	1.9875
2017-02-28	6.7	27.78	84.3	15.5	13.5	11.4	60.6	0	0.8	2.2	Exceding	0	23	12	4	0	0	21	5	10	15						58.3	30	1.94333	0.943333	602	500	1.204	0.204	166	75	2.21333	1.21333									124	80	1.55
2017-03-28	6.3	11.25	32.38	5.8	4.4	10.4	17.9	0.3	0.3	0	Number of Failed Variables(Paramaters)	7															61.9	30	2.06333	1.06333	702	500	1.404	0.404	166	75	2.21333	1.21333									181.8	80	2.2725
2017-10-28	7	52.1	190.63	28.1	27.6	14.5	159	0.07	0.2	0	Total number of Parameters	10															31.6	30	1.05333	0.0533333	518	500	1.036	0.036	235	75	3.13333	2.13333									165	80	2.0625
2017-11-28	7.24	58.3	181.2	7.1045	6.2561	5.65	124	0.1626	1.5664	0.04	Total number of Tests	300															46.4	30	1.54667	0.546667	622	500	1.244	0.244													132	80	1.65
2017-12-28	7.23	61.9	222.68	39.6	34.8	17.1	181.8	0.12	-0.05	-0.05	Total number of failed tests	90															38.9	30	1.29667	0.296667	748	500	1.496	0.496													109	80	1.3625
2018-01-28	6.3	20.91	60.53	9.8	8	8.2	45.9	0.15	0.4	0	Total excursion Values	643.193															53.5	30	1.78333	0.783333	1269.81	500	2.53962	1.53962													91.9	80	1.14875
2018-02-28	6.8	24.88	70.16	12.1	11.5	6.7	56.1	0	0.1	0	F1	70															33.7	30	1.12333	0.123333	1527.08	500	3.05416	2.05416													403	80	5.0375
2018-03-28	6.6	31.6	63.61	16	14.1	9.2	39.3	0.11	4	1.4	F2	30															32.4	30	1.08	0.08	1655.61	500	3.31122	2.31122													381	80	4.7625
2018-10-25	7.23	46.4	316	28.7	25	18.1	165	0.09	0.2	0.01	nse	2.14398															33.6	30	1.12	0.12	2117.2	500	4.23441	3.23441													400	80	5
2018-11-20	6.8	38.9	320	25.5	24.5	18.4	132	0.04	0.52	0.16	F3	68.1932															84	30	2.8	1.8	545.49	500	1.09098	0.09098													299	80	3.7375
2018-12-19	7.44	53.5	288	24.6	25.4	18.6	109	0.03	0.02	0.01	CCME_WQI_WetUpstream	40.9776															76.5	30	2.55	1.55	531.86	500	1.06372	0.06372													378	80	4.725
2019-01-30	7.06	33.7	312	20	18.5	16.2	91.9	0.01	0.1	0.03	Parameters	pH	EC mS/m	TDS mg/l	Ca mg/l	Mg mg/l	Na mg/l	SO4 mg/l	Al mg/l	Fe mg/l	Mn mg/l						92	30	3.06667	2.06667																	439	80	5.4875
2019-02-26	7.19	32.4	310	16.4	15.7	14.4	75.7	0.02	0.08	-0.01	Average	5.61967	79.2047	503.484	50.6168	39.6831	18.7083	316.976	3.39642	1.57155	2.63877						79.5	30	2.65	1.65																	881	80	11.0125
2019-03-27	6.82	33.6	308	19.2	18.3	16.5	75.6	0.02	2.11	0.07	BIS (Sn)	8	30	500	75	500	2000	80	5	0.75	0.18						89.2	30	2.97333	1.97333																	1072	80	13.4
2019-10-28	6.71	84	660	64	53.7	21.6	403	0.04	0.33	2	PIs=Ci/Si	0.702458	2.64016	1.00697	0.674891	0.0793663	0.00935417	3.9622	0.679284	2.0954	14.6598						111	30	3.7	2.7																	1174	80	14.675
2019-11-28	6.9	76.5	602	55.2	48.6	21.3	381	0.04	0.25	1	1/n	0.1															194	30	6.46667	5.46667																	1495	80	18.6875
2019-12-28	3.83	92	702	66.3	50.2	22.7	400	1.81	0.06	5.02	PI/n	0.0702458	0.264016	0.100697	0.0674891	0.00793663	0.000935417	0.39622	0.0679284	0.20954	1.46598						221	30	7.36667	6.36667																	92.6	80	1.1575
2020-01-28	3.54	79.5	518	47.7	37.5	19	299	1.29	0.19	4.41	CPI_WetUpstream	2.65099															255	30	8.5	7.5																	325.872	80	4.0734
2020-02-28	3.62	89.2	622	56.6	42.7	21.6	378	2.23	0.14	5.14																	309	30	10.3	9.3																	362	80	4.525
2020-03-28	3.36	111	748	59.9	46.6	21.2	439	5.19	1.61	5.91																	83.9	30	2.79667	1.79667																	354	80	4.425
2020-10-28	3.19	194	1269.81	145	94.7	30	881	11.7	7.34	10.6																	89	30	2.96667	1.96667
2020-11-28	3.28	221	1527.08	166	120	41.5	1072	15.1	6.08	17.3																	89.4	30	2.98	1.98
2020-12-28	3.2	255	1655.61	166	128	39.4	1174	20.5	6.11	15.1
2021-01-28	3.06	309	2117.2	235	151	40	1495	41.4	12.3	0.24
2021-02-28	5.86	27.3	159.08	16.7	12.8	11.3	92.6	0.46	0.57	0.16
2021-03-28	6.58	24.4	118.93	11.1	9.4	10.9	53.1	0.13	1.52	0.01
2021-10-28	3.9	83.9	485.014	43.4	41.038	19.5	325.872	0.47	0.03	2.663
2021-11-28	4.21	89	545.49	53.6	47.6	24.4	362	0.16	-0.01	3.01
2021-12-28	4.24	89.4	531.86	51.3	47.7	22.1	354	0.19	0.08	2.74
[truncated: 13 more columns]
