# Supplementary material for: Evaluation of the impact of coal mining on surface water in the Boesmanspruit, Mpumalanga, South Africa
Source: Springer Nature journal article supplement (doi:10.1007/s12665-024-11431-6), 2024-03-01
Supplement: MOESM6 [file 26822346]

## Sheet: Sheet1
DRY
DateTimeMeas	pH	EC mS/m	TDS mg/l	Ca mg/l	Mg mg/l	Na mg/l	SO4 mg/l	Al mg/l	Fe mg/l	Mn mg/l	Parameters	pH	EC mS/m	TDS mg/l	Ca mg/l	Mg mg/l	Na mg/l	SO4 mg/l	Al mg/l	Fe mg/l	Mn mg/l		pH	Obj	FT/Obj	Excursion Values	EC mS/m	Obj	FT/Obj	Excursion Values	TDS mg/l	Obj	FT/Obj	Excursion Values	Ca mg/l	Obj	FT/Obj	Excursion Values	Mg mg/l	Obj	FT/Obj	Excursion Values	Na mg/l	Obj	FT/Obj	Excursion Values	SO4 mg/l	Obj	FT/Obj
2017-04-28	6.5	8.72	23.92	4.5	2.8	6	14.5	0.12	0.6	0	BIS (Sn)	8	30	500	75	500	2000	80	5	0.75	0.18
2017-05-28	6.9	8.89	27.35	5	3.3	7.5	16.1	0.15	0.6	0	Exceding	0	0	0	0	0	0	0	0	17	0
2017-06-28	6.7	8.81	54.24	5.1	3.5	8.5	16.7	0.33	0.7	0	Number of Failed Variables(Paramaters)	1
2017-07-28	6.9	10.99	58.65	5.1	3.8	9.3	16.9	0.6	1	0	Total number of Parameters	10
2017-08-28	6.8	11.09	58.38	5	3.5	9.9	15.2	1.39	1.3	0	Total number of Tests	300
2017-09-28	6.6	13.23	43.57	5.3	3.6	13.3	23.4	1.59	2.1	0	Total number of failed tests	17
2018-04-28	7.02	8.28	27.45	4.3	2.8	7.3	17.1	0.16	0.36	-0.05	Total excursion Values	56.3467
2018-05-28	6.8	9.27	30.68	5.1	3.2	8.4	18.5	0.22	0.5	0	F1	10
2018-06-28	6.9	9.77	29.5	4.5	3.1	7.8	18.4	0.3	0.35	-0.05	F2	5.66667
2018-07-28	6.76	10.37	32.33	5.3	3.8	10	18.3	0.44	0.46	-0.05	nse	0.187822
2018-08-28	7.09	11.4	38.41	5.3	3.8	10.6	23.4	0.51	0.77	-0.05	F3	15.8123
2018-09-27	6.75	16.2	112	7.15	4.54	14.5	35.7	0.16	0.32	-0.01	CCME_WQI_DryDownstream	88.7134
2019-04-30	6.83	10.9	100	4.79	3.05	11.3	27	1.81	1.28	0.06	Parameters	pH	EC mS/m	TDS mg/l	Ca mg/l	Mg mg/l	Na mg/l	SO4 mg/l	Al mg/l	Fe mg/l	Mn mg/l
2019-05-28	7.93	13	108	4.46	2.96	11	26.9	1.25	1.414	0.04	Average	6.866	12.7253	69.8279	5.16407	3.93333	9.7452	25.3275	0.764467	0.961133	0.00433333
2019-06-27	6.52	12	110	4.88	3.25	12.3	30.6	1.27	1.36	0.03	BIS (Sn)	8	30	500	75	500	2000	80	5	0.75	0.18
2019-07-23	6.8	13.3	108	5.17	3.2	11.6	32.2	0.68	0.83	0.03	PIs=Ci/Si	0.85825	0.424178	0.139656	0.0688542	0.00786667	0.0048726	0.316594	0.152893	1.28151	0.0240741
2019-08-26	7.08	14.5	120	5.98	3.85	14.3	36	0.32	0.67	0.05	1/n	0.1
2019-09-29	6.33	16.8	126	5.81	3.86	13	36.9	0.45	0.76	0.03	PI/n	0.085825	0.0424178	0.0139656	0.00688542	0.000786667	0.00048726	0.0316594	0.0152893	0.128151	0.00240741
2020-04-28	6.82	11.4	56.916	4.002	3.234	7.09	26.1	0.2	0.75	-0.01	CPI_DryDownstream	0.327875
2020-05-28	7	11.8	60.87	4.13	3.23	8.46	25.7	0.44	0.86	0.1
2020-06-28	6.96	12.3	65.6	5.51	3.64	9.07	25.8	0.33	0.65	0.03
2020-07-28	7.13	13.6	68.8	4.05	3.51	8.85	28.3	1.14	1.94	-0.01
2020-08-28	7.28	14.2	69.6	4.32	3.75	9.35	29.5	0.3	0.99	0.03
2020-09-28	6.75	17.3	92	6.77	3.74	13.2	40.2	0.24	0.37	-0.01
2021-04-28	7.26	13.64	71.91	5.32	4.27	6.82	18.4	2	2.93	-0.01
2021-05-28	7.57	13.8	69.679	4.3	4.546	6.846	20.006	2.52	1.151	0.02
2021-06-28	6.71	13.8	58.75	4.72	5.05	7.48	9.82	0.24	0.5	-0.01
2021-07-28	6.87	16.9	90.57	6.32	7.66	9.17	36	0.73	0.81	-0.01
2021-08-28	6.04	17.6	94.95	6.4	7.62	9.22	40.4	1.24	0.94	-0.01
2021-09-28	6.38	17.9	86.713	6.34	5.84	10.2	35.8	1.804	1.569	-0.01
WET
DateTimeMeas	pH	EC mS/m	TDS mg/l	Ca mg/l	Mg mg/l	Na mg/l	SO4 mg/l	Al mg/l	Fe mg/l	Mn mg/l	Parameters	pH	EC mS/m	TDS mg/l	Ca mg/l	Mg mg/l	Na mg/l	SO4 mg/l	Al mg/l	Fe mg/l	Mn mg/l		pH	Obj	FT/Obj	Excursion Values	EC mS/m	Obj	FT/Obj	Excursion Values	TDS mg/l	Obj	FT/Obj	Excursion Values	Ca mg/l	Obj	FT/Obj	Excursion Values	Mg mg/l	Obj	FT/Obj	Excursion Values	Na mg/l	Obj	FT/Obj	Excursion Values	SO4 mg/l	Obj	FT/Obj
2017-01-28	7.2	8.8	21.88	6	3.8	7.9	8.1	0.38	1.9	0	BIS (Sn)	8	30	500	75	500	2000	80	5	0.75	0.18		8.12	8	1.015	0.015
2017-02-28	7.1	9.56	22.96	5.4	3.5	11.5	6.8	0.12	1.3	0	Exceding	1	0	0	0	0	0	0	1	18	0
2017-03-28	6.3	0.81	32.26	5.4	3.2	9.3	18.9	0.22	0.6	0	Number of Failed Variables(Paramaters)	3
2017-10-28	6.2	12.96	33.32	4.5	3	11.5	18.8	0.12	0.2	0	Total number of Parameters	10
2017-11-28	6.4	14.96	42.67	5.9	4.3	13.1	25.6	0.13	0.3	0	Total number of Tests	300
2017-12-28	6.38	14.81	43.76	6.8	4.4	11.3	27.8	0.3	0.33	-0.05	Total number of failed tests	20
2018-01-28	6.8	9.76	32.2	5.5	2.9	5.8	19.5	1.3	2.3	0	Total excursion Values	16.0663
2018-02-28	7.1	9.04	35.24	10	3	6.3	19.3	1.34	2.2	0.1	F1	30
2018-03-28	6.8	9.66	24.59	5	3.1	6.1	14.3	0.29	0.8	0.1	F2	6.66667
2018-10-25	6.87	17.4	112	8.87	5.48	13.6	54.7	0.54	0.72	0.07	nse	0.0535544
2018-11-20	6.87	15.2	108	7.8	4.75	14.3	43.3	0.18	0.57	0.05	F3	5.08322
2018-12-19	7.1	13.3	114	7.43	4.68	14.1	33.3	0.14	1.05	0.01	CCME_WQI_WetDownstream	82.0154
2019-01-30	7.34	13.6	120	5.85	3.59	12.8	31.3	0.07	0.26	0.01	Parameters	pH	EC mS/m	TDS mg/l	Ca mg/l	Mg mg/l	Na mg/l	SO4 mg/l	Al mg/l	Fe mg/l	Mn mg/l
2019-02-26	6.84	13.2	106	4.9	3.01	12.3	28.2	0.62	1.23	0.01	Average	6.845	14.722	86.9502	6.92433	4.437	11.3483	34.0833	0.733567	0.9677	0.0356667
2019-03-27	7.9	15.6	108	5.01	3.31	12.7	28.5	0.27	0.94	-0.01	BIS (Sn)	8	30	500	75	500	2000	80	5	0.75	0.18
2019-10-28	7.03	21.3	144	5.67	3.3	16.1	32.2	0.66	0.83	0.1	PIs=Ci/Si	0.855625	0.490733	0.1739	0.0923244	0.008874	0.00567417	0.426042	0.146713	1.29027	0.198148
2019-11-28	7.09	18.8	160	8.27	5.19	18.7	58.6	1.1	0.85	0.13	1/n	0.1
2019-12-28	6.27	17.9	154	8.03	4.57	12.3	57.2	0.77	0.86	0.03	PI/n	0.0855625	0.0490733	0.01739	0.00923244	0.0008874	0.000567417	0.0426042	0.0146713	0.129027	0.0198148
2020-01-28	6.8	13.2	104	5.84	3.55	13.5	31	0.38	1.43	0.01	CPI_WetDownstream	0.36883
2020-02-28	7.11	13.3	104	6.13	3.74	10.9	25.8	0.15	0.78	0.01
2020-03-28	8.12	13.3	104	4.96	3.37	9.94	26	0.4	1.09	-0.01
2020-10-28	6.82	18	100.598	7.84	4.61	14.6	42.2	-0.01	0.06	0.01
2020-11-28	7.24	20.3	100.72	8.69	5.42	15.2	42.8	-0.01	0.02	0.05
2020-12-28	7.27	22.9	118.43	10.25	6.64	15.5	51	0.15	0.3	0.14
2021-01-28	6.15	23.8	135.06	11.83	6.94	17.6	53.7	0.27	0.28	0.17
2021-02-28	6.91	13.4	62.27	5.26	4.47	7.46	29.4	0.01	0.01	-0.01
2021-03-28	6.66	12.5	59.848	4.9	4.49	6.32	16.8	1.097	1.621	0.03
2021-10-28	5.74	22.2	122.3	9.47	7.88	8.46	72.4	2.46	1.05	0.06
2021-11-28	6.78	20.6	118.35	9.58	7.62	8.57	68.1	2.51	1.87	-0.01
2021-12-28	6.16	11.5	64.05	6.65	5.3	2.7	36.9	6.05	3.28	0.07
[truncated: 13 more columns]
